# Supplementary material for: Probing the origin of estrogen receptor alpha inhibitionvialarge-scale QSAR study
Source: Royal Society of Chemistry journal article supplement (doi:10.1039/c7ra10979b), 2018-01-01
Supplement: c7ra10979b1.pdf [file c7ra10979b1.pdf]

## Supplementary Information

# Probing the origin of estrogen receptor alpha inhibition via large-scale QSAR study

Naravut Suvannang<sup>a</sup>, Likit Preeyanon<sup>b</sup>, Aijaz Ahmad Malik<sup>a</sup>, Nalini Schaduangrat<sup>a</sup>,  
Watshara Shoombuatong<sup>a</sup>, Apilak Worachartcheewan<sup>b</sup>, Tanawut Tantimongcolwat<sup>c</sup>, and  
Chanin Nantasenamat<sup>\*1</sup>

<sup>a</sup>*Center of Data Mining and Biomedical Informatics, Faculty of Medical Technology, Mahidol University, Bangkok  
10700, Thailand*

<sup>b</sup>*Department of Community Medical Technology, Faculty of Medical Technology, Mahidol University, Bangkok 10700,  
Thailand*

<sup>c</sup>*Center for Research and Innovation, Faculty of Medical Technology, Mahidol University, Bangkok 10700, Thailand*

---

\*Corresponding author. E-mail: chanin.nan@mahidol.edu

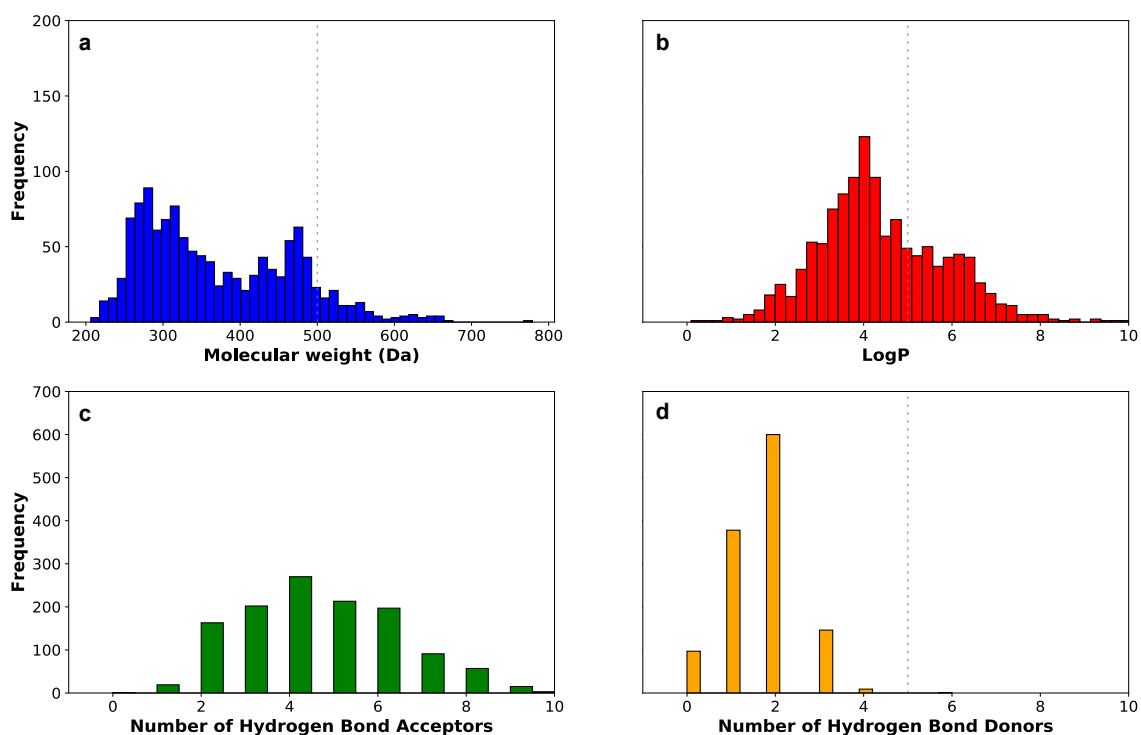

**Supplementary Figure 1.** Histogram plots of frequency count of Ro5 descriptors for ER $\alpha$  inhibitors. This consisted of molecular weight (a), LogP (b), number of hydrogen bond acceptors (c) and number of hydrogen bond donors (d).

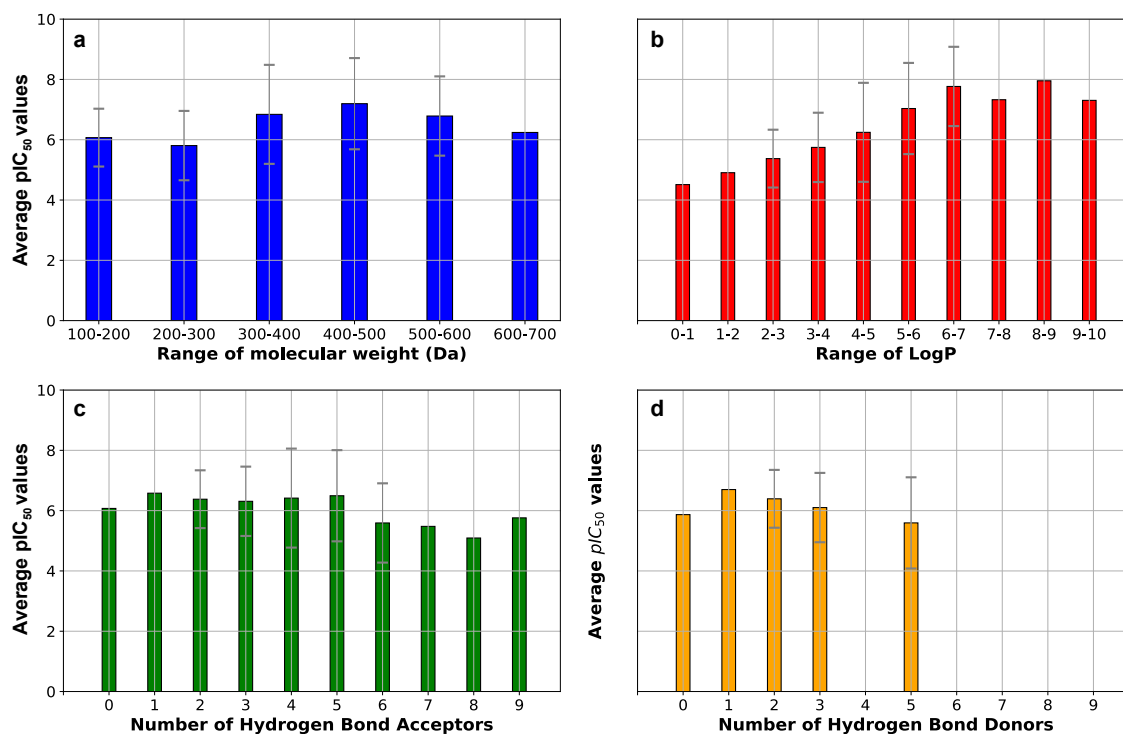

**Supplementary Figure 2.** Histogram plots of mean pIC<sub>50</sub> values for Ro5 descriptors for ER $\alpha$  inhibitors. This consisted of molecular weight (a), LogP (b), number of hydrogen bond acceptors (c) and number of hydrogen bond donors (d).

**Supplementary Table 1**Summary of predictive performance for QSAR model of ER $\alpha$  inhibitory activity.

| Fingerprint class  | Training set |              | 10-fold CV set |              | External set |               | $R^2 - Q_{cv}^2$ | $Q^2 - Q_{ext}^2$ |
|--------------------|--------------|--------------|----------------|--------------|--------------|---------------|------------------|-------------------|
|                    | $R_{Tr}^2$   | RMSE $_{Tr}$ | $Q_{CV}^2$     | RMSE $_{CV}$ | $Q_{Ext}^2$  | RMSE $_{Ext}$ |                  |                   |
| AtomPairs 2D count | 0.93         | 0.38         | 0.73           | 0.72         | 0.73         | 0.53          | 0.20             | 0.003             |
| AtomPairs 2D       | 0.85         | 0.54         | 0.67           | 0.80         | 0.68         | 0.62          | 0.18             | -0.01             |
| CDK fingerprinter  | 0.87         | 0.51         | 0.68           | 0.78         | 0.71         | 0.56          | 0.19             | -0.03             |
| CDK extended       | 0.84         | 0.55         | 0.69           | 0.78         | 0.67         | 0.65          | 0.16             | 0.02              |
| CDK graph only     | 0.81         | 0.60         | 0.66           | 0.81         | 0.70         | 0.58          | 0.15             | -0.04             |
| E-State            | 0.80         | 0.63         | 0.66           | 0.82         | 0.64         | 0.71          | 0.14             | 0.02              |
| Klekota-Roth count | 0.91         | 0.41         | 0.71           | 0.75         | 0.72         | 0.54          | 0.20             | -0.01             |
| Klekota-Roth       | 0.82         | 0.60         | 0.65           | 0.82         | 0.70         | 0.59          | 0.16             | -0.04             |
| MACCS              | 0.86         | 0.52         | 0.73           | 0.72         | 0.71         | 0.58          | 0.13             | 0.03              |
| PubChem            | 0.84         | 0.57         | 0.70           | 0.76         | 0.71         | 0.56          | 0.13             | -0.01             |
| Substructure count | 0.94         | 0.34         | 0.73           | 0.72         | 0.73         | 0.52          | 0.21             | -0.004            |
| Substructure       | 0.87         | 0.51         | 0.69           | 0.77         | 0.68         | 0.63          | 0.18             | 0.02              |
